# Supplementary material
Source: PubMed Central journal article supplement (PMC3559198)
Supplement: Supp_Data.pdf [file Supp_Data.pdf]

## Supplementary Data

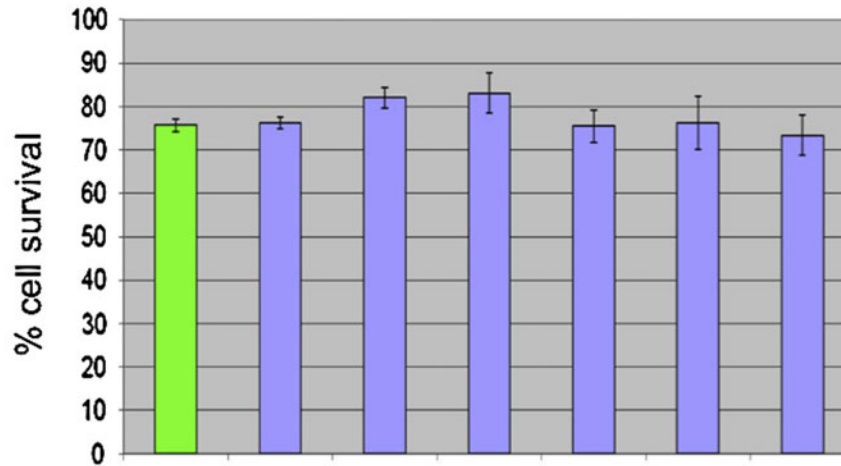

|                      |      |      |      |      |      |      |      |
|----------------------|------|------|------|------|------|------|------|
| pEGFP                | 1 μg |
| CFi9-R <sup>WT</sup> |      | 1 μg |      |      |      | 1 μg |      |
| CFi9-L <sup>WT</sup> |      |      | 1 μg |      |      | 1 μg |      |
| CFi9-R <sup>KK</sup> |      |      |      | 1 μg |      |      | 1 μg |
| CFi9-L <sup>EL</sup> |      |      |      |      | 1 μg |      | 1 μg |
| pcDNA3.1+            | 3 μg | 2 μg | 2 μg | 2 μg | 2 μg | 1 μg | 1 μg |

**SUPPLEMENTARY FIG. S1.** Percentage survival of cells transfected with pEGFP and pZFNs expressed as mean ± standard error of the mean. The amount of each plasmid used in transfections is shown in μg. ZFN1/2<sup>WT</sup> and ZFN 1<sup>KK</sup>/2<sup>EL</sup> do not cause toxicity in the CFTE cell line. 300,000 CFTE cells were transfected with 4 μg DNA/10 μL lipofectamine<sup>2000</sup>. The number of EGFP-positive cells was recorded at 24 and 72 h post-transfection by FACS (Beckman Coulter), with 100% representing the level of EGFP-positive cells after 24 h in EGFP-only-transfected cells. The ratio of EGFP-positive cells in ZFN transfections compared to the ratio of EGFP-positive cells in pcDNA3.1+ only transfections was determined. None of the ZFN combinations tested displayed any significant decrease in cell survival, relative to cells transfected with pcDNA3.1+. It should be noted that transfection of CFTE cells with pEGFP results in a 25% reduction in cell survival over 72 h. However, this level of cell death has been reported by other groups<sup>16</sup> after a lipid-based transfection. All transfections were carried out in triplicate. ZFN, zinc-finger nucleases; CFTE, cystic fibrosis tracheal epithelial; EGFP, enhanced green fluorescent protein.
